# Supplementary material for: LC-MS/MS-based metabolomics approach identified novel antioxidant flavonoids associated with drought tolerance in citrus species
Source: Front Plant Sci. 2023 Aug 10;14:1150854. doi: 10.3389/fpls.2023.1150854 (PMC10450343; doi:10.3389/fpls.2023.1150854)
Supplement: Supplementary file 3 [file Table_3.xlsx]

## Sheet: MRM transition and Raw data
	Supplementary table 2 (raw data): Signifies the MRM transitions and concentration of flavonoids compounds (nmol/g) in the leaves of citrus varieties under drought stress.
Compounds	Class	Formula	Molecular Weight	Ionization model	Q1 (Da)	Q3 (Da)	CAS	KEGG cpd_ID	kegg_map	RT	Equation	r	LLOQ	ULOQ	Weighting	Control SO	12-DS-SO	18-DS-SO	Control Pummelo	12-DS-Pummelo	18-DS-Pummelo	Control Lemon	12-DS-Lemon	18-DS-Lemon
Naringenin chalcone	Chalcones	C15H12O5	272.068	[M-H]-	271.1	151	25515-46-2	C06561	ko00941,ko01100,ko01110	4.98	y = 16856.71642 x + 1386.35298	0.99982	5	2000	1 / x	0.122041	0.0912586	0.0436487	0.253257	0.241822	0.170861	0.00560081	0.0038949	0.00798499
(-)-Epigallocatechin	Flavanols	C15H14O7	306.074	[M+H]+	307.1	139	970-74-1	C12136	ko00941,ko01110	2.01	y = 3591.02493 x + 4181.99966	0.99879	5	2000	1 / x	0.0532935	0.0559226	0.027879	0.0363857	0.0306386	0.0458168	0.13274	0.129688	0.117904
Neohesperidin	Flavanones	C28H34O15	610.19	[M-H]-	609.2	301.1	13241-33-3	C09806	ko00941	4.1	y = 5.52843e4 x - 16385.37072	0.99861	1	2000	1 / x	39.7456	76.366	69.4975	0.0836536	0.109715	0.0493789	0	0	1.8483
Isosakuranetin	Flavanones	C16H14O5	286.084	[M-H]-	285.1	164	480-43-3	C05334	ko00941,ko01110	7.12	y = 12920.81549 x + 271.67282	0.99987	1	2000	1 / x	0.00245159	0.013093	0.0223694	0	0	0	0.00226923	0.163395	0.627893
Hesperetin	Flavanones	C16H14O6	302.079	[M-H]-	301.1	164	520-33-2	C01709	ko00941	5.29	y = 3.45136e4 x + 1900.30766	0.99996	0.5	2000	1 / x	0.130198	0.0472057	0.0176921	0	0	0	0.0426087	0.0212476	0.0346972
Pinocembrin	Flavanones	C15H12O4	256.074	[M-H]-	255.1	213.1	480-39-7	C09827	ko00941	7.19	y = 4479.68964 x + 1063.09169	0.99864	1	2000	1 / x	0.0229772	0	0.0262678	0.0130833	0.0229208	0.0267218	0.0178421	0.0467549	0.107009
Eriocitrin	Flavanones	C27H32O15	596.174	[M-H]-	595.2	287.1	13463-28-0	C09732		2.74	y = 17532.89145 x - 1799.49114	0.9978	1	2000	1 / x	1.20183	1.7319	4.28463	0.0687106	0.108943	0.0282602	148.25	101.517	49.1659
Eriodictyol	Flavanones	C15H12O6	288.063	[M-H]-	287.1	135	552-58-9	C05631	ko00941,ko01100,ko01110	4.18	y = 4550.56713 x - 1734.30662	0.99933	5	2000	1 / x	0.167947	0	0	0.102055	0	0.0707569	0.316288	0.223517	0.178736
Taxifolin	Flavanonols	C15H12O7	304.058	[M-H]-	303.1	125	480-18-2	C01617	ko00941,ko01100,ko01110	3.15	y = 6293.82625 x - 22503.41482	0.99804	5	2000	1 / x	0	0	0	0	0	0.111385	0.224613	0.229012	0.156377
Vitexin	Flavone glycosides	C21H20O10	432.106	[M-H]-	431.1	311.1	3681-93-4	C01460	ko00941,ko00944	2.81	y = 5.69540e4 x - 12486.38150	0.99727	1	2000	1 / x	0.183357	0.220799	1.20419	0.18481	0.453771	0.935948	0.622676	0.975227	0.773566
Luteolin	Flavones	C15H10O6	286.048	[M-H]-	285	133	491-70-3	C01514	ko00941,ko00944,ko01100,ko01110	4.22	y = 18298.50566 x + 3741.68481	0.99948	5	2000	1 / x	0.00810883	0.0109901	0.0374945	0.00322284	0	0	0.0575563	0.0293542	0.00629061
Sakuranetin	Flavones	C16H14O5	286.084	[M-H]-	285.1	165	2957-21-3	C09833	ko00941,ko01110	7.06	y = 4.27445e4 x + 2830.89240	0.99969	1	2000	1 / x	0.000689558	0.00108098	0.00185019	0	0.000171988	0.000439782	0.00352807	0.00526449	0.00546465
Diosmin	Flavones	C28H32O15	608.174	[M-H]-	607.2	299.1	520-27-4	C10039		3.08	y = 3.70536e4 x - 4780.78550	0.9992	1	2000	1 / x	103.051	131.49	108.644	9.18834	14.2483	6.35813	192.345	187.686	188.812
Apigenin	Flavones	C15H10O5	270.053	[M-H]-	269.1	117	520-36-5	C01477	ko00941,ko00943,ko00944,ko01100,ko01110	4.98	y = 12713.88532 x - 756.19109	0.99986	5	2000	1 / x	0.16876	0.0455759	0.130949	0.15808	0.134375	0.170582	0.0960538	0.0552642	0.0480774
Galangin	Flavones	C15H10O5	270.053	[M-H]-	269	211	548-83-4	C10044	ko00941	7.26	y = 1762.75106 x + 444.83892	0.99804	10	2000	1 / x	0.0732499	0.0582137	0.0664956	0.108539	0.102401	0.100331	0.152432	0.144369	0.0751939
Narcissin	Flavones	C28H32O16	624.169	[M-H]-	623.2	315.1	604-80-8	-		2.97	y = 24285.22180 x - 5030.49433	0.99884	5	2000	1 / x	28.1306	38.5892	49.0322	0	0	0	32.0625	48.6935	90.3128
Tricetin	Flavones	C15H10O7	302.043	[M-H]-	301	149	520-31-0	C10192	ko00941	3.55	y = 3.59756e4 x - 8072.66137	0.999	5	2000	1 / x	0	0	0	0	0	0	0.0258298	0.0251117	0.0229942
Cynaroside	Flavones	C21H20O11	448.101	[M-H]-	447.1	285	1268798	-		2.88	y = 25915.27941 x + 2751.53771	0.99813	5	2000	1 / x	0.102996	0.353966	2.49223	0	0	0	0.202994	0.226599	0.152717
Acacetin	Flavones	C16H12O5	284.068	[M-H]-	283.1	268	480-44-4	C01470	ko00944	7.08	y = 5.55672e4 x + 3.03102e4	0.99779	5	2000	1 / x	0	0	0	0	0	0	0.0376298	0.101044	0.0276545
Scutellarein	Flavones	C15H10O6	286.048	[M-H]-	285	117	529-53-3	C10184		3.75	y = 4277.33303 x + 11537.65708	0.99542	5	2000	1 / x	0.0115915	0.0257311	0.0979464	0	0	0.244523	0	0.0257871	0.419136
Limocitrin	Flavones	C17H14O8	346.069	[M-H]-	345.06	315.02	489-33-8	-		3.82	y = 2306.05066 x - 3624.52031	0.99957	10	2000	1 / x	0	0	0	51.601	60.4677	53.5151	0	0	0
Chrysin	Flavones	C15H10O4	254.058	[M-H]-	253.1	143.1	480-40-0	C10028	ko00941	7	y = 6722.57196 x - 32.11654	0.99988	5	2000	1 / x	0.00805486	0.0172762	0.0219164	0	0	0	0.00664428	0.00670184	0
Baimaside	Flavonols	C27H30O17	626.148	[M-H]-	625.1	300	18609-17-1	C12667	ko00944,ko01110	2.51	y = 3.01299e4 x - 9294.51881	0.99932	1	2000	1 / x	0.0668808	1.2634	0.145393	0.0800474	0	0	0.0560036	0.079717	0.0669402
Astragalin	Flavonols	C21H20O11	448.101	[M-H]-	447.1	284	480-10-4	C12249	ko00944,ko01110	3.09	y = 26569.61663 x + 5206.16224	0.998	1	2000	1 / x	0.0351213	0.0721265	0.0572948	0.0569345	0.131297	0.142195	0	0	0
3,7-Di-O-methylquercetin	Flavonols	C17H14O7	330.074	[M-H]-	329.1	314.1	61395	C01265	ko00944,ko01110	6.51	y = 1.35334e5 x + 5.77167e4	0.99895	1	2000	1 / x	0.0167052	0.00350805	0.0207617	0	0	0	0.0198741	0.0234247	0.0112782
Rutin	Flavonols	C27H30O16	610.153	[M-H]-	609.1	300	153-18-4	C05625	ko00944,ko01100,ko01110	2.74	y = 4.01514e4 x - 11812.44682	0.99699	1	2000	1 / x	1.42917	1.10065	2.7188	0.0621531	0.12238	0.096049	54.999	63.9468	52.7989
Quercitrin	Flavonols	C21H20O11	448.101	[M-H]-	447.1	300	522-12-3	C01750	ko00944	3.14	y = 17884.29517 x - 7175.78110	0.99512	1	2000	1 / x	0.047381	0.0217572	0.0299272	0	0	0.0245062	0	0.0374229	0
Kaempferide	Flavonols	C16H12O6	300.063	[M-H]-	299.1	284	491-54-3	C10098	ko00944	7.33	y = 9.92569e4 x + 6.65409e4	0.99982	1	2000	1 / x	0	0	0	0	0	0	0.0410277	0.0496717	0.0641586
Kaempferol 3-neohesperidoside	Flavonols	C27H30O15	594.158	[M-H]-	593.2	284	32602-81-6	-		2.8	y = 17028.06345 x - 2318.09435	0.9993	5	2000	1 / x	36.4057	81.9482	124.413	7.95351	16.9865	5.33052	0	0	7.33364
Laricitrin	Flavonols	C16H12O8	332.053	[M-H]-	331.1	316	53472-37-0	C12633	ko00944,ko01110	4.28	y = 18391.03874 x + 3925.67337	0.99842	5	2000	1 / x	0	0	0	0	0	0	0.11015	0.162614	0
Myricetin	Flavonols	C15H10O8	318.038	[M-H]-	317	151	529-44-2	C10107	ko00941,ko00944,ko01110	3.5	y = 16340.26158 x - 3.95252e4	0.99813	5	2000	1 / x	0	0	0	0	0	0	0.109888	0.106928	0.114201
Hyperoside	Flavonols	C21H20O12	464.095	[M+H]+	465.1	314.9	482-36-0	-		2.84	y = 38.79847 x + 1611.92140	0.99545	1	2000	1 / x	101.31	209.403	368.009	24.5404	37.4815	42.6962	151.022	155.235	148.627
2'-Hydroxygenistein	Isoflavanones	C15H10O6	286.048	[M-H]-	285	217.1	1156-78-1	C12134	ko00943	4.07	y = 27073.69708 x + 7065.48965	0.99891	1	2000	1 / x	0	0	0.00401949	0	0	0	0	0	0
2'-Hydroxydaidzein	Isoflavanones	C15H10O5	270.053	[M-H]-	269	225.1	7678-85-5	C02495	ko00943,ko01110	3.54	y = 21986.67477 x + 9881.96265	0.99944	5	2000	1 / x	0	0	0.00865786	0	0	0	0	0	0
Genistin	Isoflavanones	C21H20O10	432.106	[M-H]-	431.1	268	529-59-9	-		3	y = 2886.73189 x + 11091.65262	0.99707	10	2000	1 / x	0.212716	1.11022	2.32977	0.876745	3.32998	1.76162	1.58463	1.65184	1.05309
Formononetin	Isoflavanones	C16H12O4	268.074	[M-H]-	267.1	252.1	485-72-3	C00858	ko00943,ko01100,ko01110	5.98	y = 1.11029e5 x + 3533.76242	0.99986	1	2000	1 / x	0.000801413	0.000641726	9.43325e-05	9.4065e-05	0	0	0.000512774	0.000339568	0.00030163
Calycosin	Isoflavanones	C16H12O5	284.068	[M-H]-	283.1	268	20575-57-9	C01562	ko00943,ko01110	4.31	y = 4.64528e4 x - 56.06262	0.99986	1	2000	1 / x	0.0793811	0.0753461	0.0665469	0	0.010015	0	0	0	0
